# Supplementary material for: Structural transition in KMnCrF6 – a chemically ordered magnetic ferroelectric
Source: Royal Society of Chemistry journal article supplement (doi:10.1039/c4tc02038c), 2015-01-01
Supplement: c4tc02038c1.pdf [file c4tc02038c1.pdf]

## Supporting Information for:

# Structural transition in $\text{KMnCrF}_6$ – a chemically ordered magnetic ferroelectric.

Christina Drathen,<sup>\*a,c</sup> Takeshi Nakagawa,<sup>b‡</sup> Wilson A. Crichton,<sup>c</sup> Adrian H. Hill,<sup>c§</sup> Yasuo Ohishi<sup>d</sup> and  
Serena Margadonna<sup>b</sup>

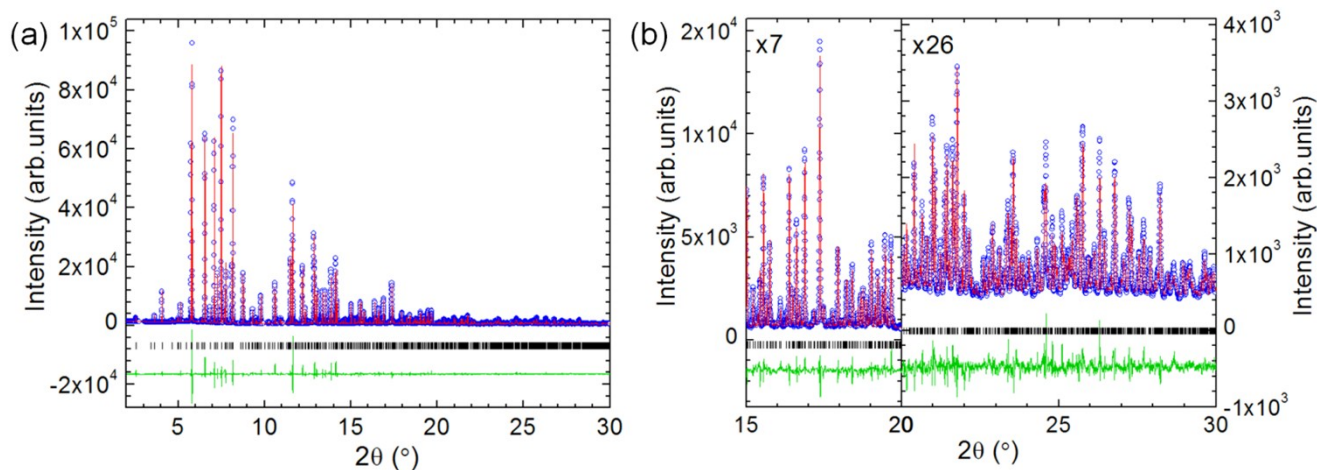

10 **Fig. S1** (a) Final observed (open blue circles), calculated (red line) and difference (green line) synchrotron X-ray powder diffraction profile of  $\text{KMnCrF}_6$  (space group  $P4_2/mbc$ ), collected on ID31 (ESRF),  $\lambda = 0.39992 \text{ \AA}$ ,  $T = 5 \text{ K}$ . The lower solid green line shows the difference profiles and the tick marks show the reflection positions. (b) Magnification of the high  $2\theta$  region.

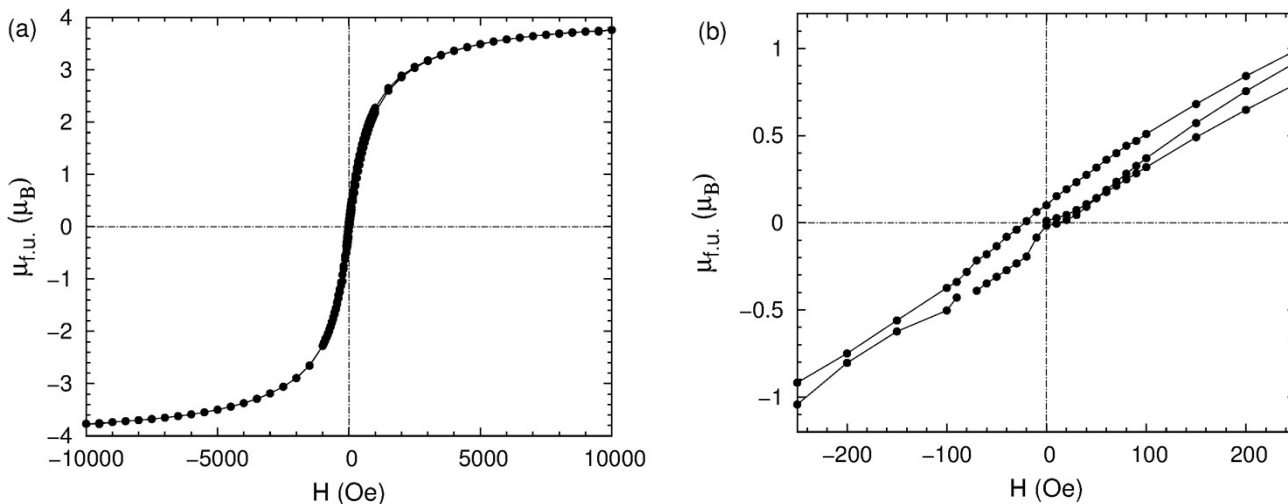

**Fig. S2** (a) The magnetic hysteresis loop measured at  $T = 5 \text{ K}$  with  $H_{\text{max}} = 10000 \text{ Oe}$  with an almost saturated moment of  $3.76 \mu_B$  per formula unit of  $\text{KMnCrF}_6$ . (b) The magnification of the low field regime shows the small coercive field of  $\sim 50 \text{ Oe}$ .

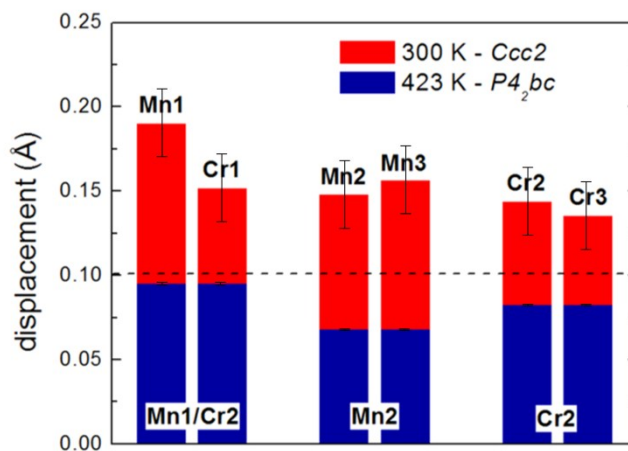

**Fig. S3** The displacements of Mn and Cr from the basal plane of the coordination octahedra, which is defined by the mean plane of coordinating fluorine. Whilst the displacement along the polar  $c$ -axis is small in the tetragonal phase, it exceeds 0.1 Å at and below 300 K.

**5 Table S1** Rietveld refinement results at 423 K in space group  $P4_2bc$ .<sup>a</sup>

| space group: $P4_2bc$<br>$a = 12.68202(1)$ Å |      | No. 106<br>$c = 7.97617(1)$ Å |           |           | $T = 423$ K<br>$V = 1282.837(2)$ Å <sup>3</sup> |          |
|----------------------------------------------|------|-------------------------------|-----------|-----------|-------------------------------------------------|----------|
|                                              |      | $x$                           | $y$       | $z$       | $B_{iso}/\text{Å}^2$                            | Occ.     |
| Mn1                                          | $4b$ | 0                             | 0.5       | 0.012(1)  | 0.70(3)                                         | 0.5      |
| Cr1                                          | $4b$ | 0                             | 0.5       | 0.012(1)  | 0.70(3)                                         | 0.5      |
| Mn2                                          | $8c$ | 0.0738(3)                     | 0.7873(2) | 0.5085(5) | 0.57(5)                                         | 1        |
| Cr2                                          | $8c$ | 0.4250(3)                     | 0.2886(2) | 0.0103(5) | 0.85(6)                                         | 1        |
| K1                                           | $8c$ | 0.8359(2)                     | 0.6801(2) | 0.759(1)  | 2.81(4)                                         | 1        |
| K2                                           | $4a$ | 0                             | 0         | 0.751(2)  | 1.17(7)                                         | 0.584(2) |
| F1                                           | $8c$ | 0.5675(6)                     | 0.3492(5) | -0.012(1) | 2.44(3)                                         | 1        |
| F2                                           | $8c$ | 0.9277(6)                     | 0.8633(5) | 0.498(1)  | 2.44(3)                                         | 1        |
| F3                                           | $8c$ | 0.7837(5)                     | 0.2753(5) | 0.001(2)  | 2.44(3)                                         | 1        |
| F4                                           | $8c$ | 0.4966(4)                     | 0.1542(7) | -0.010(1) | 2.44(3)                                         | 1        |
| F5                                           | $8c$ | 0.9822(4)                     | 0.6547(7) | 0.501(1)  | 2.44(3)                                         | 1        |
| F6                                           | $4b$ | 0                             | 0.5       | 0.745(2)  | 2.44(3)                                         | 1        |
| F7                                           | $8c$ | 0.2089(4)                     | 0.0746(5) | 0.750(2)  | 2.44(3)                                         | 1        |
| F8                                           | $8c$ | 0.2914(4)                     | 0.5782(5) | 0.261(2)  | 2.44(3)                                         | 1        |

<sup>a</sup>  $wR_p = 7.88\%$ ;  $R_p = 6.00\%$ .

**Table S2** The atomic positions as determined from Rietveld refinements in space groups  $P4_2bc$  and  $P4_2/mbc$  at  $T = 423$  K. The displacement  $d(z)$  is calculated by comparing the atomic positions of group ( $P4_2bc$ ) and subgroup ( $P4_2/mbc$ ).

|     | Wyckoff site |            | $z(P4_2bc)$ | $z(P4_2/mbc)$ | $d(z)$ | $d(z) \cdot c / \text{\AA}$ |
|-----|--------------|------------|-------------|---------------|--------|-----------------------------|
|     | $P4_2bc$     | $P4_2/mbc$ |             |               |        |                             |
| Mn1 | 4b           | 4c         | 0.0119      | 0             | 0.0119 | 0.095                       |
| Cr1 | 4b           | 4c         | 0.0119      | 0             | 0.0119 | 0.095                       |
| Mn2 | 8c           | 8h         | 0.5085      | 0.5           | 0.0085 | 0.068                       |
| Cr2 | 8c           | 8h         | 0.0103      | 0             | 0.0103 | 0.082                       |
| K1  | 8c           | 8g         | 0.759       | 0.75          | 0.009  | 0.072                       |
| K2  | 4a           | 4b         | 0.751       | 0.75          | 0.001  | 0.008                       |
| F1  | 8c           | 8h         | -0.012      | 0             | -0.012 | -0.096                      |
| F2  | 8c           | 8h         | 0.498       | 0.5           | -0.002 | -0.016                      |
| F3  | 8c           | 8h         | 0.001       | 0             | 0.001  | 0.008                       |
| F4  | 8c           | 8h         | -0.010      | 0             | -0.010 | -0.080                      |
| F5  | 8c           | 8h         | 0.501       | 0.5           | 0.001  | 0.008                       |
| F6  | 4b           | 4d         | 0.745       | 0.75          | -0.005 | -0.040                      |
| F7  | 8c           | 16i        | 0.750       | 0.7409        | 0.0091 | 0.073                       |
| F8  | 8c           |            | 0.261       | 0.2409        | 0.0201 | 0.160                       |

**Table S3** The atomic positions as determined from Rietveld refinements in space groups *Ccc2* and *Cccm* at  $T = 300$  K. The displacement  $d(z)$  is calculated by comparing the atomic positions of group (*Ccc2*) and subgroup (*Cccm*).

|     | Wyckoff site |             | $z(Ccc2)$ | $z(Cccm)$ | $d(z)$ | $d(z) \cdot c / \text{\AA}$ |
|-----|--------------|-------------|-----------|-----------|--------|-----------------------------|
|     | <i>Ccc2</i>  | <i>Cccm</i> |           |           |        |                             |
| Mn1 | 4 <i>b</i>   | 4 <i>c</i>  | 0.520     | 0.5       | 0.020  | 0.159                       |
| Cr1 | 4 <i>a</i>   | 4 <i>d</i>  | 0.024     | 0         | 0.024  | 0.191                       |
| Mn2 | 8 <i>d</i>   | 8 <i>l</i>  | 0.519     | 0.5       | 0.019  | 0.151                       |
| Mn3 | 8 <i>d</i>   | 8 <i>l</i>  | 0.020     | 0         | 0.020  | 0.159                       |
| Cr2 | 8 <i>d</i>   | 8 <i>l</i>  | 0.019     | 0         | 0.019  | 0.151                       |
| Cr3 | 8 <i>d</i>   | 8 <i>l</i>  | 0.518     | 0.5       | 0.018  | 0.143                       |
| K1  | 8 <i>d</i>   | 8 <i>h</i>  | 0.268     | 0.25      | 0.018  | 0.143                       |
| K2  | 8 <i>d</i>   | 8 <i>g</i>  | 0.769     | 0.75      | 0.019  | 0.151                       |
| K3  | 4 <i>c</i>   | 8 <i>k</i>  | 0.765     | 0.750     | 0.015  | 0.119                       |
| K4  | 4 <i>c</i>   |             | 0.266     | 0.250     | 0.016  | 0.127                       |
| F1  | 8 <i>d</i>   | 8 <i>l</i>  | 0.014     | 0         | 0.014  | 0.111                       |
| F2  | 8 <i>d</i>   | 8 <i>l</i>  | 0.502     | 0.5       | 0.002  | 0.016                       |
| F3  | 8 <i>d</i>   | 8 <i>l</i>  | 0.985     | 0         | -0.015 | -0.119                      |
| F4  | 8 <i>d</i>   | 8 <i>l</i>  | 0.497     | 0.5       | -0.003 | -0.024                      |
| F5  | 8 <i>d</i>   | 8 <i>l</i>  | 0.003     | 0         | 0.003  | 0.024                       |
| F6  | 8 <i>d</i>   | 8 <i>l</i>  | 0.505     | 0.5       | 0.005  | 0.040                       |
| F7  | 8 <i>d</i>   | 8 <i>l</i>  | 0.007     | 0         | 0.007  | 0.056                       |
| F8  | 8 <i>d</i>   | 8 <i>l</i>  | 0.487     | 0.5       | -0.013 | -0.103                      |
| F9  | 8 <i>d</i>   | 8 <i>l</i>  | 0.996     | 1         | -0.004 | -0.032                      |
| F10 | 8 <i>d</i>   | 8 <i>l</i>  | 0.512     | 0.5       | 0.012  | 0.095                       |
| F11 | 8 <i>d</i>   | 16 <i>m</i> | 0.256     | 0.240     | 0.006  | 0.127                       |
| F12 | 8 <i>d</i>   |             | 0.756     | 0.760     | -0.005 | -0.040                      |
| F13 | 8 <i>d</i>   | 16 <i>m</i> | 0.767     | 0.741     | 0.026  | 0.206                       |
| F14 | 8 <i>d</i>   |             | 0.268     | 0.259     | 0.009  | 0.071                       |
| F15 | 4 <i>a</i>   | 4 <i>a</i>  | 0.256     | 0.25      | 0.006  | 0.048                       |
| F16 | 4 <i>a</i>   | 4 <i>b</i>  | 0.745     | 0.75      | -0.005 | -0.040                      |
